# Supplementary material
Source: publisher figshare collection journal article supplement (https://acs.figshare.com/ndownloader/files/3794434)
Supplement: Supplementary file 1 [file 3794434]

88
Compound 1 - electronic energy = -3278.07241433 a.u.
 Ru                    0.04374  -0.26324   0.00561 
 Cl                    0.11391  -1.77898   1.96118 
 C                     0.04605   0.31515  -1.74691 
 O                     0.06433   0.61096  -2.87455 
 P                     2.48338  -0.37534   0.01648 
 P                    -2.37974  -0.57494  -0.01515 
 P                    -0.07152   1.89472   0.84405 
 C                    -0.34716   3.14932  -0.23885 
 H                    -0.45408   2.94674  -1.30577 
 C                    -0.47517   4.62927   0.10079 
 C                    -1.85936   5.11877  -0.38788 
 H                    -1.98818   4.93568  -1.46007 
 H                    -2.66569   4.59794   0.13698 
 H                    -1.97047   6.19568  -0.21219 
 C                    -0.33624   4.9184    1.60576 
 H                    -1.11208   4.40638   2.184 
 H                     0.63625   4.59127   1.98783 
 H                    -0.42903   5.99394   1.79395 
 C                     0.62626   5.40013  -0.66648 
 H                     0.55986   5.21702  -1.74478 
 H                     0.52747   6.47991  -0.50233 
 H                     1.62278   5.09502  -0.33041 
 C                    -2.78552  -2.14678  -0.9034 
 C                    -3.83199  -2.25814  -1.8317 
 C                    -2.00744  -3.28174  -0.61315 
 C                    -4.0887   -3.47678  -2.46444 
 H                    -4.44895  -1.39749  -2.06531 
 C                    -2.27326  -4.49703  -1.24416 
 H                    -1.20709  -3.21336   0.11804 
 C                    -3.30979  -4.59734  -2.17461 
 H                    -4.90083  -3.54692  -3.18266 
 H                    -1.66687  -5.3663   -1.00597 
 H                    -3.51116  -5.54374  -2.66858 
 C                    -3.39277   0.71385  -0.87332 
 C                    -4.33308   1.48919  -0.17879 
 C                    -3.19255   0.96545  -2.2421 
 C                    -5.05729   2.48635  -0.83659 
 H                    -4.50527   1.3158    0.87727 
 C                    -3.9226    1.95633  -2.89761 
 H                    -2.47148   0.38516  -2.80655 
 C                    -4.8572    2.72158  -2.19638 
 H                    -5.782     3.07521  -0.28145 
 H                    -3.7575    2.1302   -3.95706 
 H                    -5.42379   3.49498  -2.70701 
 C                    -3.23068  -0.76012   1.61124 
 C                    -2.76749  -0.04616   2.72595 
 C                    -4.36826  -1.57091   1.74297 
 C                    -3.44041  -0.13183   3.94524 
 H                    -1.87547   0.56491   2.64484 
 C                    -5.0335   -1.66012   2.96623 
 H                    -4.7336   -2.13794   0.89299 
 C                    -4.57224  -0.93916   4.06886 
 H                    -3.0691    0.42316   4.80186 
 H                    -5.90999  -2.29555   3.05638 
 H                    -5.08895  -1.01147   5.0218 
 C                     3.40695   0.29251   1.47057 
 C                     4.72658   0.75622   1.3355 
 C                     2.79472   0.33303   2.73288 
 C                     5.42028   1.2462    2.44241 
 H                     5.2134    0.74103   0.36605 
 C                     3.49473   0.8241    3.83624 
 H                     1.78162  -0.0343    2.85064 
 C                     4.80517   1.28233   3.6952 
 H                     6.43942   1.60292   2.32267 
 H                     3.0089    0.8493    4.80739 
 H                     5.34476   1.66765   4.55592 
 C                     3.33925   0.44066  -1.40573 
 C                     4.26642  -0.22772  -2.21819 
 C                     3.05858   1.79289  -1.66503 
 C                     4.89928   0.44281  -3.26804 
 H                     4.49756  -1.2712   -2.03422 
 C                     3.69709   2.4599   -2.70906 
 H                     2.33488   2.32314  -1.05306 
 C                     4.61826   1.78636  -3.51481 
 H                     5.61326  -0.08899  -3.89065 
 H                     3.46892   3.50517  -2.89687 
 H                     5.11122   2.30591  -4.33159 
 C                     2.99733  -2.13973  -0.12217 
 C                     3.98455  -2.71007   0.69123 
 C                     2.35535  -2.94094  -1.08111 
 C                     4.32568  -4.05668   0.54488 
 H                     4.48298  -2.10778   1.44294 
 C                     2.70467  -4.28178  -1.23138 
 H                     1.57713  -2.51477  -1.70863 
 C                     3.68998  -4.84347  -0.41558 
 H                     5.08811  -4.48942   1.18629 
 H                     2.20216  -4.88886  -1.97898 
 H                     3.95674  -5.89069  -0.52605 
88
Compound 2 - electronic energy = -3529.49949013	 a.u.
Ru	-0.0625501	-0.3751368	-0.0012731
Cl	-0.1573348	-1.7581532	2.0509592
P	0.1235442	1.8071889	0.6967556
P	2.3483487	-0.7718176	-0.0165916
P	-2.5030246	-0.4453167	0.0160550
Si	0.5963635	4.8407355	0.0672241
O	-0.0645255	0.3570077	-2.9235443
C	0.3835035	3.0347411	-0.4120783
H	0.4594028	2.8200681	-1.4807526
C	0.5556930	5.0713589	1.9442616
H	0.6691439	6.1312150	2.2001758
H	1.3642697	4.5209826	2.4361403
H	-0.3893753	4.7231183	2.3733556
C	2.2541693	5.4584246	-0.6153079
H	2.4133644	6.5152221	-0.3705964
H	2.2962652	5.3579753	-1.7055160
H	3.0893564	4.8842805	-0.2012478
C	-0.7973742	5.8618050	-0.7187100
H	-0.6696398	6.9304304	-0.5090085
H	-1.7764066	5.5601027	-0.3310695
H	-0.8172644	5.7385925	-1.8073809
C	-0.0535131	0.1110967	-1.7847797
C	3.3769415	0.4233388	-0.9831268
C	3.2037911	0.5341050	-2.3738618
H	2.5042448	-0.1127559	-2.8915436
C	3.9325598	1.4686019	-3.1086447
H	3.7884742	1.5346834	-4.1832318
C	4.8381736	2.3163925	-2.4670515
H	5.4028550	3.0464415	-3.0397488
C	5.0120384	2.2197377	-1.0868981
H	5.7152197	2.8729350	-0.5780112
C	4.2889429	1.2796766	-0.3489551
H	4.4396663	1.2147503	0.7226122
C	3.2166733	-0.8523138	1.6100059
C	2.7775030	-0.0565656	2.6779785
H	1.8910394	0.5576953	2.5672536
C	3.4668389	-0.0642416	3.8912340
H	3.1138796	0.5543664	4.7112282
C	4.5910162	-0.8745440	4.0564820
H	5.1205874	-0.8856143	5.0050043
C	5.0277086	-1.6775081	3.0015334
H	5.8976086	-2.3164091	3.1247074
C	4.3461731	-1.6667189	1.7841946
H	4.6924600	-2.2986336	0.9729200
C	2.6980496	-2.4169100	-0.7856779
C	3.7688775	-2.6380463	-1.6657291
H	4.4307055	-1.8223650	-1.9355430
C	3.9907048	-3.9074434	-2.2043539
H	4.8223242	-4.0626307	-2.8859885
C	3.1514602	-4.9700477	-1.8677846
H	3.3255881	-5.9564420	-2.2884125
C	2.0893125	-4.7599128	-0.9859886
H	1.4353348	-5.5830194	-0.7124388
C	1.8585964	-3.4933930	-0.4484767
H	1.0383689	-3.3407352	0.2472821
C	-3.0375358	-2.2084287	-0.0233311
C	-3.9973366	-2.7283875	0.8539092
H	-4.4632256	-2.0845597	1.5918126
C	-4.3533087	-4.0775100	0.7889152
H	-5.0942177	-4.4702157	1.4794059
C	-3.7601638	-4.9173708	-0.1534540
H	-4.0385363	-5.9662944	-0.2010039
C	-2.8025001	-4.4060735	-1.0330239
H	-2.3334941	-5.0541655	-1.7678752
C	-2.4378683	-3.0626169	-0.9639834
H	-1.6820106	-2.6760202	-1.6422492
C	-3.4170013	0.3151494	1.4304748
C	-2.7977283	0.4378855	2.6839417
H	-1.7858971	0.0739902	2.8214119
C	-3.4899434	1.0050880	3.7553995
H	-2.9986337	1.0937674	4.7200295
C	-4.7993569	1.4578972	3.5905715
H	-5.3327522	1.9029526	4.4259385
C	-5.4218259	1.3389798	2.3464450
H	-6.4403887	1.6906351	2.2083456
C	-4.7360575	0.7730151	1.2714525
H	-5.2282544	0.6947393	0.3077755
C	-3.3486763	0.3023487	-1.4487889
C	-3.0475355	1.6334023	-1.7830652
H	-2.3147982	2.1862309	-1.2029770
C	-3.6785862	2.2518396	-2.8609935
H	-3.4348027	3.2814820	-3.1063680
C	-4.6124592	1.5493023	-3.6262933
H	-5.0995599	2.0305685	-4.4695908
C	-4.9139535	0.2260785	-3.3049607
H	-5.6380441	-0.3279228	-3.8957174
C	-4.2887371	-0.3953484	-2.2209045
H	-4.5354617	-1.4233021	-1.9789412
95
Compound 3 - electronic energy = -3721.23264439 a.u.
Ru	-0.7320915	0.4294034	0.0327624
P	0.5553267	-1.2851247	0.8533591
P	-2.8390901	-0.7934802	-0.0306305
P	1.0893039	2.0644788	0.0269609
Cl	-1.5851054	1.5575102	2.0675337
Si	2.6661857	-3.5542954	0.3890230
C	-4.4216550	-2.7453536	1.2753068
C	3.7876839	0.7986168	-2.8174137
C	-4.1527608	0.4738284	-0.2824301
C	1.1604597	4.8658906	0.5408125
C	2.1580279	2.0089318	-1.4798796
C	2.7922515	1.6324921	3.7580850
C	0.4269399	3.7856599	0.0290932
C	-3.3896394	-1.8013603	1.4167008
C	4.9151044	-1.7706992	0.6044747
C	2.3139723	2.0300021	1.4118899
C	-3.0747549	-1.9712402	-1.4367260
C	-4.0848638	1.2901355	-1.4255276
C	2.9968010	0.8972484	-1.6740552
C	2.1202682	3.0094162	-2.4610212
C	1.8895886	1.6439715	2.6936334
C	4.4374573	-2.9670674	0.0338582
C	4.1239683	2.0005243	3.5599481
C	-2.2203944	-3.8668947	-2.6939222
C	4.5528004	2.3883466	2.2893329
C	-6.0992834	1.7203187	0.4528779
C	1.4882703	-2.2104468	-0.1878023
C	-0.8389246	4.0238863	-0.5260644
C	3.6548733	2.4034443	1.2202051
C	2.9065956	2.9013254	-3.6108793
C	6.2112646	-1.3140362	0.3628121
C	-2.0730607	-2.9264029	-1.6753102
C	-6.0326439	2.5192282	-0.6883464
C	7.0674144	-2.0464650	-0.4633861
C	-4.2220339	-3.3406684	3.6106736
C	-3.3648784	-3.8634434	-3.4940367
C	5.3186669	-3.6854743	-0.7935496
C	-4.2229551	-1.9769322	-2.2430877
C	-0.6191747	6.3878119	-0.0698789
C	-2.7783182	-1.6390379	2.6683735
C	-5.1658515	0.7015584	0.6568027
C	6.6179799	-3.2341947	-1.0414902
C	-3.1962736	-2.4071543	3.7574924
C	-5.0234594	2.3005200	-1.6298560
C	2.4782775	-3.8956650	2.2387329
C	-4.3637792	-2.9165839	-3.2670094
C	-1.3565144	5.3179373	-0.5798586
C	3.7425807	1.7997948	-3.7908831
C	-4.8360572	-3.5070202	2.3669684
C	0.6382506	6.1589495	0.4916541
O	-0.1814863	-0.2697718	-2.8483289
C	-0.3739095	-0.0241593	-1.7280915
C	2.3278372	-5.1432711	-0.5857230
H	-1.0256933	7.3946595	-0.1030410
H	-2.3412577	5.4854394	-1.0061405
H	-1.4294518	3.1935331	-0.9010210
H	1.2134784	6.9864588	0.8970850
H	2.1359271	4.6985697	0.9853798
H	4.0040503	2.6983258	0.2366070
H	5.5866571	2.6798687	2.1260424
H	4.8243733	1.9855313	4.3903356
H	0.8530050	1.3671897	2.8547839
H	2.4501620	1.3313545	4.7440335
H	3.0396331	0.1083795	-0.9301723
H	1.4808601	3.8757094	-2.3309653
H	2.8660573	3.6845829	-4.3626061
H	4.3561234	1.7204187	-4.6838080
H	4.4377140	-0.0622585	-2.9435248
H	4.2650997	-1.1792059	1.2460085
H	6.5500543	-0.3866041	0.8168732
H	8.0770458	-1.6931092	-0.6550985
H	7.2776444	-3.8097993	-1.6857296
H	4.9916434	-4.6135652	-1.2555923
H	1.4842365	-2.0265844	-1.2649841
H	-3.3021327	1.1287200	-2.1619867
H	-4.9652559	2.9171929	-2.5223931
H	-6.7607604	3.3101054	-0.8440730
H	-6.8776193	1.8890150	1.1914517
H	-5.2230433	0.0905506	1.5506169
H	-4.8968721	-2.8933355	0.3110498
H	-5.6339212	-4.2339086	2.2436759
H	-4.5423024	-3.9382074	4.4596787
H	-2.7149450	-2.2711876	4.7215955
H	-1.9973238	-0.8985608	2.7926337
H	-1.1728357	-2.9318286	-1.0685150
H	-1.4353574	-4.5974130	-2.8666818
H	-3.4754515	-4.5925232	-4.2916520
H	-5.2569245	-2.9061021	-3.8854094
H	-5.0085909	-1.2480425	-2.0760049
H	3.1767097	-4.6792998	2.5525951
H	2.6846927	-3.0042017	2.8388342
H	1.4635641	-4.2293401	2.4798723
H	2.4059018	-4.9834803	-1.6665307
H	3.0248106	-5.9436136	-0.3125035
H	1.3144078	-5.5022672	-0.3763672
98
Compound 4 - electronic energy = -3760.55266364	 a.u.
Ru	-0.9052310	0.4157640	0.0312100
P	0.4491570	-1.2456200	0.8560540
P	-2.9569270	-0.8943110	-0.0438970
P	0.8466020	2.1253050	0.0382920
Cl	-1.8135610	1.5007310	2.0660040
Si	2.6545810	-3.4247420	0.4057800
C	-4.4497580	-2.9273360	1.2448750
C	3.6006290	0.9855880	-2.8071970
C	-4.3225760	0.3170000	-0.2939160
C	0.8016510	4.9254520	0.5634820
C	1.9206470	2.1201530	-1.4659630
C	2.5538840	1.7443360	3.7726440
C	0.1145600	3.8182760	0.0448600
C	-3.4671230	-1.9336380	1.3965490
C	4.8126340	-1.5422950	0.7048620
C	2.0669010	2.1358330	1.4273190
C	-3.1374120	-2.0734830	-1.4571150
C	-4.2837400	1.1432330	-1.4311480
C	2.8066300	1.0462710	-1.6632990
C	1.8399100	3.1211030	-2.4439880
C	1.6556630	1.7221020	2.7046200
C	4.4009170	-2.7485500	0.1032420
C	3.8680060	2.1745260	3.5823850
C	-2.1989170	-3.9235280	-2.7223330
C	4.2835700	2.5901170	2.3161000
C	-6.3252670	1.4729280	0.4381670
C	1.4222850	-2.1335310	-0.1803640
C	-1.1585710	4.0071100	-0.5129850
C	3.3900430	2.5711490	1.2433670
C	2.6302060	3.0510030	-3.5939930
C	6.0914940	-1.0265170	0.5082440
C	-2.0950870	-2.9837690	-1.6976940
C	-6.2866890	2.2820930	-0.6971220
C	7.0212960	-1.6912320	-0.3056310
C	-4.2333650	-3.5233430	3.5785860
C	-3.3400170	-3.9641890	-3.5262730
C	5.3400500	-3.4054370	-0.7086780
C	-4.2818300	-2.1235670	-2.2672540
C	-1.0366020	6.3762140	-0.0468490
C	-2.8715330	-1.7469490	2.6525160
C	-5.3499540	0.4938770	0.6405950
C	6.6232080	-2.8890540	-0.9086390
C	-3.2566930	-2.5401410	3.7356870
C	-5.2638260	2.1136670	-1.6341960
C	2.4356380	-3.8026510	2.2453000
C	-4.3792700	-3.0624020	-3.2969890
C	-1.7282620	5.2792630	-0.5632300
C	3.5127450	1.9870610	-3.7774630
C	-4.8313480	-3.7142340	2.3306390
C	0.2273850	6.1963660	0.5177290
O	-0.3099830	-0.2532500	-2.8482370
C	-0.5190030	-0.0183240	-1.7286380
C	2.4161850	-5.0144660	-0.5967510
H	-1.4837340	7.3657920	-0.0771820
H	-2.7178470	5.4081960	-0.9917160
H	-1.7143680	3.1551590	-0.8926240
H	0.7671340	7.0449120	0.9284490
H	1.7814610	4.7962950	1.0111250
H	3.7290240	2.8879710	0.2629990
H	5.3036040	2.9298220	2.1590890
H	4.5651360	2.1861530	4.4155860
H	0.6320630	1.3976810	2.8594280
H	2.2222820	1.4210880	4.7551630
H	2.8835350	0.2572940	-0.9221510
H	1.1635220	3.9583970	-2.3109940
H	2.5558680	3.8342180	-4.3431910
H	4.1286850	1.9366960	-4.6708610
H	4.2855160	0.1527480	-2.9372760
H	4.1229060	-0.9901910	1.3400340
H	6.3718210	-0.0932180	0.9921310
H	7.3255250	-3.4264930	-1.5422820
H	5.0760390	-4.3403800	-1.1967710
H	1.4158180	-1.9518370	-1.2578700
H	-3.4906430	1.0209290	-2.1640800
H	-5.2273480	2.7384450	-2.5222390
H	-7.0474510	3.0418620	-0.8516930
H	-7.1144110	1.6025660	1.1731620
H	-5.3855250	-0.1255690	1.5296820
H	-4.9113950	-3.0942750	0.2771860
H	-5.5907420	-4.4799120	2.1993700
H	-4.5277270	-4.1405470	4.4228980
H	-2.7880640	-2.3850320	4.7031500
H	-2.1289560	-0.9691150	2.7846580
H	-1.1975570	-2.9548350	-1.0875100
H	-1.3828740	-4.6188520	-2.8966360
H	-3.4168030	-4.6926070	-4.3284570
H	-5.2701800	-3.0865580	-3.9182340
H	-5.0983610	-1.4298640	-2.0987190
H	3.1701190	-4.5482050	2.5695100
H	2.5711690	-2.9094810	2.8629530
H	1.4359660	-4.1991780	2.4518410
H	2.5087880	-4.8363760	-1.6735500
H	3.1477680	-5.7814540	-0.3184570
H	1.4185350	-5.4277710	-0.4134750
C	8.4001930	-1.1173010	-0.5324730
H	9.0658500	-1.8472680	-1.0018720
H	8.3626130	-0.2367570	-1.1859460
H	8.8603040	-0.7974370	0.4087920
95
Compound 5 - electroinc energy = -3043.44962421	 a.u.
C	-1.2207505	2.8110354	-0.2095142
H	-1.8534489	2.7613610	0.6774669
C	-0.0455784	0.7565998	-2.0881428
C	-2.4829826	4.9040476	-0.7142123
H	-3.0329544	5.4893087	-1.4615150
H	-1.6618092	5.5222454	-0.3363346
H	-3.1638387	4.7007194	0.1199613
C	-3.1535748	2.7858060	-1.8584996
H	-3.7024339	3.3689381	-2.6084745
H	-3.8486707	2.5339102	-1.0527426
H	-2.8317265	1.8524458	-2.3277635
C	-1.0329010	3.9568743	-2.5166285
H	-1.5873946	4.5652099	-3.2405838
H	-0.6636782	3.0756076	-3.0444626
H	-0.1703378	4.5498434	-2.1903214
C	0.5486727	3.1507704	3.1338024
H	0.8823372	4.1676870	3.2801112
C	0.2111183	2.1518941	4.0400033
H	0.2218266	2.2152406	5.1177410
C	-0.1475505	1.0443376	3.2496122
H	-0.4580583	0.0544603	3.5504594
C	2.5072592	-1.6017443	-1.3633544
C	1.4456969	-2.4322368	-1.7453019
H	0.4470918	-2.2225988	-1.3809433
C	1.6558956	-3.5154195	-2.6014235
H	0.8150592	-4.1404065	-2.8876050
C	2.9340715	-3.7778640	-3.0938205
H	3.0996512	-4.6148056	-3.7666269
C	4.0005475	-2.9540329	-2.7248647
H	4.9981031	-3.1486629	-3.1090987
C	3.7905276	-1.8745924	-1.8668950
H	4.6270145	-1.2397960	-1.5939574
C	2.8292103	-0.8660318	1.4129559
C	3.1816633	-2.2136117	1.5870375
H	3.1174528	-2.9023372	0.7515954
C	3.6265354	-2.6803842	2.8273171
H	3.9012111	-3.7259299	2.9383852
C	3.7320823	-1.8086488	3.9116506
H	4.0832294	-2.1710450	4.8737030
C	3.3861797	-0.4648538	3.7496950
H	3.4632702	0.2243509	4.5858010
C	2.9328133	0.0003694	2.5160395
H	2.6697838	1.0472818	2.4075992
C	3.5301000	0.9811916	-0.6835384
C	4.7684293	1.0463633	-0.0265265
H	4.9638907	0.4114375	0.8302037
C	5.7642057	1.9247548	-0.4633892
H	6.7130001	1.9635647	0.0649366
C	5.5444686	2.7423019	-1.5709292
H	6.3186253	3.4247987	-1.9101718
C	4.3201576	2.6782694	-2.2399209
H	4.1361858	3.3100378	-3.1042544
C	3.3214601	1.8126065	-1.7967550
H	2.3729052	1.7872383	-2.3206777
C	-2.2388611	-1.9463826	-1.3740676
C	-2.2289634	-3.3413901	-1.2178894
H	-2.0492522	-3.7774091	-0.2418072
C	-2.4502391	-4.1834254	-2.3111900
H	-2.4381591	-5.2604300	-2.1673534
C	-2.6938063	-3.6477455	-3.5759542
H	-2.8686523	-4.3032691	-4.4242962
C	-2.7088965	-2.2613335	-3.7438967
H	-2.8929372	-1.8309570	-4.7239843
C	-2.4754539	-1.4201815	-2.6566679
H	-2.4764038	-0.3469770	-2.8105353
C	-1.7706369	-1.9364953	1.4791996
C	-0.5075002	-2.2883179	1.9723237
H	0.3779373	-1.8536372	1.5249527
C	-0.3764320	-3.1755344	3.0441100
H	0.6148468	-3.4250131	3.4109457
C	-1.5128571	-3.7236135	3.6390499
H	-1.4154805	-4.4099621	4.4756815
C	-2.7790310	-3.3823239	3.1562023
H	-3.6691193	-3.8043432	3.6147508
C	-2.9083941	-2.4962236	2.0866287
H	-3.8979788	-2.2378437	1.7246975
C	-3.5697339	-0.0470280	0.3659376
C	-4.7142191	-0.3364140	-0.3895501
H	-4.6562160	-1.0251227	-1.2248153
C	-5.9420683	0.2558880	-0.0788476
H	-6.8162786	0.0213274	-0.6800145
C	-6.0477490	1.1372773	0.9961307
H	-7.0024891	1.5963954	1.2362794
C	-4.9157721	1.4234134	1.7643612
H	-4.9865752	2.1049649	2.6075756
C	-3.6891892	0.8404754	1.4502644
H	-2.8180177	1.0745623	2.0539388
N	-0.0336324	1.3531180	1.9518601
N	0.3910637	2.6397254	1.8915059
O	0.0226471	0.6745067	-3.2519712
P	2.1722763	-0.1981087	-0.1912291
P	-1.8902784	-0.7770237	0.0268257
P	0.5085888	3.1966572	0.1532505
Ru	-0.0960306	0.8695615	-0.2453803
C	-1.9476472	3.5862322	-1.3309101
95
Compound 7 - electronic energy = -3294.88045963	 a.u.
C	-1.4375785	2.5407421	0.3735884
H	-2.0715963	2.2961376	1.2279443
C	-0.1502669	1.0570490	-1.8492231
C	-3.4612957	4.8223225	0.1219433
H	-4.0358323	5.4776990	-0.5434152
H	-2.8524358	5.4587381	0.7736135
H	-4.1767301	4.2863466	0.7561294
C	-3.5161203	2.6102539	-2.0050899
H	-4.1733103	3.2800515	-2.5726802
H	-4.1484204	1.9139490	-1.4460281
H	-2.9290712	2.0372300	-2.7297618
C	-1.1946335	4.6107605	-1.9578369
H	-1.7656650	5.2665652	-2.6255737
H	-0.5780688	3.9607291	-2.5866897
H	-0.5264490	5.2447391	-1.3651079
C	0.4056261	2.4541057	3.7227719
H	0.6167613	3.4598009	4.0559609
C	0.2320934	1.2674630	4.4257780
H	0.2785661	1.1271362	5.4952619
C	-0.0191482	0.2921494	3.4425121
H	-0.1934737	-0.7682378	3.5523338
C	2.6422089	-1.1468416	-1.6638971
C	1.6356878	-1.9624749	-2.1970124
H	0.6314488	-1.9021442	-1.7946088
C	1.9068254	-2.8392146	-3.2499457
H	1.1074343	-3.4567019	-3.6488101
C	3.1910346	-2.9059924	-3.7894499
H	3.4035968	-3.5810153	-4.6138918
C	4.2026921	-2.0938407	-3.2703462
H	5.2042952	-2.1357636	-3.6894822
C	3.9321780	-1.2211973	-2.2166674
H	4.7262552	-0.5919278	-1.8286810
C	3.0070319	-0.9200858	1.1949210
C	3.4534423	-2.2480600	1.1078058
H	3.3942417	-2.7790258	0.1638366
C	3.9870136	-2.8969066	2.2251711
H	4.3332575	-3.9228778	2.1334137
C	4.0892857	-2.2285577	3.4456064
H	4.5099975	-2.7310791	4.3119919
C	3.6499400	-0.9060565	3.5439111
H	3.7235203	-0.3742874	4.4882852
C	3.1080265	-0.2607095	2.4331109
H	2.7734480	0.7671152	2.5283001
C	3.4597308	1.3460112	-0.5237922
C	4.7315093	1.3757574	0.0694990
H	5.0293494	0.5940405	0.7593164
C	5.6296069	2.4077841	-0.2165018
H	6.6064365	2.4144784	0.2595030
C	5.2773355	3.4197874	-1.1085315
H	5.9757437	4.2217528	-1.3304718
C	4.0184417	3.3958343	-1.7124317
H	3.7310232	4.1789132	-2.4082279
C	3.1171630	2.3739262	-1.4174809
H	2.1382536	2.3798598	-1.8823969
C	-2.0536708	-1.9574968	-1.6051651
C	-1.8824628	-3.3461537	-1.7184760
H	-1.6066182	-3.9325587	-0.8494728
C	-2.0641881	-3.9893535	-2.9458706
H	-1.9272070	-5.0653589	-3.0106857
C	-2.4276026	-3.2592846	-4.0776248
H	-2.5718557	-3.7609622	-5.0302399
C	-2.6040073	-1.8774323	-3.9767554
H	-2.8846212	-1.2965948	-4.8505941
C	-2.4113976	-1.2321782	-2.7557872
H	-2.5464947	-0.1581689	-2.6990953
C	-1.4876996	-2.4270573	1.1892512
C	-0.1835687	-2.7534517	1.5833338
H	0.6473493	-2.1680518	1.2084506
C	0.0555397	-3.8103363	2.4659637
H	1.0757107	-4.0383785	2.7604234
C	-1.0116704	-4.5552354	2.9681037
H	-0.8300119	-5.3747533	3.6579331
C	-2.3174288	-4.2401624	2.5825447
H	-3.1538727	-4.8151508	2.9702537
C	-2.5549438	-3.1851461	1.7014766
H	-3.5738827	-2.9499268	1.4123868
C	-3.4636010	-0.5112021	0.4849310
C	-4.6148761	-0.7464582	-0.2794612
H	-4.5423770	-1.2654619	-1.2285271
C	-5.8688001	-0.3205532	0.1706297
H	-6.7481232	-0.5100162	-0.4388535
C	-5.9928506	0.3368896	1.3936750
H	-6.9675382	0.6664663	1.7419552
C	-4.8535666	0.5657461	2.1698790
H	-4.9384062	1.0720511	3.1274656
C	-3.6020445	0.1498653	1.7185726
H	-2.7250536	0.3353914	2.3309036
N	0.0014539	0.8520900	2.2271535
N	0.2600145	2.1711857	2.4084503
O	-0.1624767	1.2557725	-3.0003582
P	2.2311311	-0.0278124	-0.2370021
P	-1.7506226	-1.0380918	-0.0205338
P	0.2302438	3.0538694	0.8013512
Ru	-0.1062860	0.7834041	-0.0235810
Si	-2.3791918	3.6093451	-0.8638708
